# Supplementary material
Source: HighWire-hosted journal article supplement (https://bmjmedicine.bmj.com/highwire/filestream/655/field_highwire_adjunct_files/0/bmjmed-2022-000302supp001_data_supplement.pdf)
Supplement: bmjmed-2022-000302supp001_data_supplement.pdf [file bmjmed-2022-000302supp001_data_supplement.pdf]

**Table 1S** | Definitions of Vaccine-induced Immune Thrombocytopenia and Thrombosis (VITT) according to Expert Haematology Panel <sup>17</sup>

|               |                                                                                                                                                                                                                                                                                                                                                                                                                                                                    |
|---------------|--------------------------------------------------------------------------------------------------------------------------------------------------------------------------------------------------------------------------------------------------------------------------------------------------------------------------------------------------------------------------------------------------------------------------------------------------------------------|
| Definite VITT | All five criteria: <ol style="list-style-type: none"> <li>1. Onset of symptoms 5–30 days after vaccination against SARS-CoV-2 (or <math>\leq 42</math> days in patients with isolated deep-vein thrombosis or pulmonary embolism)</li> <li>2. Presence of thrombosis</li> <li>3. Thrombocytopenia (platelet count <math>&lt; 150 \times 10^9/L</math>)</li> <li>4. D-dimer <math>&gt; 4000</math> FEU</li> <li>5. Positive anti-PF4 antibodies on ELISA</li> </ol> |
| Probable VITT | D-dimer level $> 4000$ FEU but one criterion not met (timing, thrombosis, thrombocytopenia, or anti-PF4 antibodies) or d-dimer level unknown or $2000$ – $4000$ FEU and all other criteria met                                                                                                                                                                                                                                                                     |
| Possible VITT | D-dimer level unknown or $2000$ – $4000$ FEU with one other criterion not met, or two other criteria not met (timing, thrombosis, thrombocytopenia, or anti-PF4 antibodies)                                                                                                                                                                                                                                                                                        |
| Unlikely VITT | Platelet count $< 150 \times 10^9/L$ and d-dimer level $< 2000$ FEU, or thrombosis with platelet count $> 150 \times 10^9/L$ and d-dimer level $< 2000$ FEU, regardless of anti-PF4 antibody result, and alternative diagnosis more likely                                                                                                                                                                                                                         |

Key: ELISA, enzyme-linked immunosorbent assay; FEU, fibrinogen-equivalent unit; PF4, platelet factor 4 and SARS-CoV-2, severe acute respiratory syndrome coronavirus 2.

**Table 2S** |Brighton Collaboration interim case definition of Thrombosis with Thrombocytopenia

|               |                                                                                                                                                                                                                                                                                                                                                                                                                                                                                                                                                                                                                                                                                         |
|---------------|-----------------------------------------------------------------------------------------------------------------------------------------------------------------------------------------------------------------------------------------------------------------------------------------------------------------------------------------------------------------------------------------------------------------------------------------------------------------------------------------------------------------------------------------------------------------------------------------------------------------------------------------------------------------------------------------|
| Confirmed TTS | Presence of major criteria: <ol style="list-style-type: none"> <li>1. presence of new onset severe thrombocytopenia defined as a platelet count <math>&lt;50 \times 10^9/L</math>, and</li> <li>2. new thrombosis at uncommon site: cerebral veins, splanchnic veins or multiple organ</li> <li>3. Positive anti-platelet factor 4 antibodies</li> </ol>                                                                                                                                                                                                                                                                                                                                |
| Probable TTS  | Presence of major and minor criteria: <ol style="list-style-type: none"> <li>1. presence of new onset severe thrombocytopenia defined as a platelet count <math>&lt;50 \times 10^9/L</math>, and</li> <li>2. new thrombosis at common site: pulmonary arteries/veins, limb veins, coronary arteries, cerebral arteries or other arteries/vein</li> </ol> OR <ol style="list-style-type: none"> <li>1. presence of new onset mild to moderate thrombocytopenia defined as a platelet count <math>&lt;150 \times 10^9/L</math>, and</li> <li>2. new thrombosis at uncommon site.</li> </ol>                                                                                               |
| Possible TTS  | Presence of minor criteria: <ol style="list-style-type: none"> <li>1. presence of new onset mild to moderate thrombocytopenia defined as a platelet count <math>&lt;150 \times 10^9/L</math>, and</li> <li>2. new thrombosis at common site.</li> </ol> or <ol style="list-style-type: none"> <li>1. presence of new onset thrombocytopenia defined as a platelet count <math>&lt;150</math> or <math>&gt;50 \times 10^9/L</math>, or <math>&gt;50\%</math> decrease from baseline platelet count and</li> <li>2. suggestive thrombosis by supporting imaging or laboratory findings or by clinical syndromes in any location</li> <li>3. D-dimer <math>&gt; 4000</math> FEU</li> </ol> |

## Supplementary material

### Clinical twin study

#### Data & Methodology

We assessed the risk of 179 conditions post vaccination with AD26.COV2.s amongst Discovery Health clients from 17 February 2021 to 15 September 2021, 18 years and older that had at least 6 months of exposure on Discovery Health. The list of conditions includes 25 conditions analysed in a real world safety study of BNT162b2 vaccination in Israel (Noam Barda, 2021), and a further 154 conditions which are considered immune mediated conditions (Table 4a). Real world safety studies amongst large populations are more likely to provide sufficient volumes to power risk ratio estimates of rare adverse events amongst the vaccinated population compared to randomized control studies which typically have lower volumes. The safety and immunogenicity study of the AD26.COV2.s vaccine was based on 43, 783 participants, split equally between those vaccinated with and those vaccinated with placebo (Sadoff, 2021). Comparison against unvaccinated controls provides greater certainty that identified adverse events are vaccine induced as it provides a risk relative to the population's baseline risk over a consistent timeframe. Registries of voluntary vaccine safety adverse events such as VAERS and the reporting system managed by the South African Health Products Regulatory Agency, unfortunately lack a relevant temporal comparison of underlying adverse events in the unvaccinated general population. This study compares adverse events amongst the vaccinated population against 'clinical twins' who did not receive vaccination. The 'clinical twin' approach was based on the following matching criteria:

- **Age:** clinical twins were matched within one year of age of each other
- **Member's sex:** Male (M) or Female (F)
- **Location:** Hospital service area in South Africa
- **Number of chronic conditions:** 0, 1, 2, 3, 4 or more
- **Number of prior flu vaccinations:** 0, 1, 2, 3, 4, 5 or more. People who had a flu vaccination in the years leading up to and during the COVID-19 pandemic were likely to be more aware of promoting their general health and wellbeing and adhere to preventive measures.
- **One of five medical scheme product options:** Looking at out-of-hospital benefits we divided the 24 plans available through both Discovery Health Medical Scheme and 18 of the Discovery Health administered schemes, into 5 groups.

We assessed the rate of 179 adverse events in the vaccinated population, from the date of vaccination until 42 days after receipt of vaccination to matched unvaccinated ‘clinical twin’ controls. For each condition assessed, clients with a history of the condition were excluded from the analysis i.e. both the vaccinated and matched unvaccinated controls had no prior history of the condition, resulting in the new onset of the condition of interest being analysed after vaccination, relative to the matched baseline population. Individuals with a history of any prior COVID19 vaccination were excluded.

To obtain confidence intervals around risk ratio estimates and the number of adverse events in the study and comparator populations, we bootstrapped amongst our vaccinated population with replacement 500 times. Within each bootstrap vaccinated individuals were matched to a clinical twin, randomly. Once a clinical twin was selected, it was not eligible for selection again within a particular bootstrap. The 95% confidence interval was obtained by the following formula for each of the respective measures analysed (i.e. the risk ratio and number adverse events) :  $95\%CI = \mu \pm 1.96\sigma$  , where  $\mu$  is the mean and  $\sigma$  is the standard deviation across bootstraps.

## Results

103,315 vaccinated individuals were included in the study. There was a higher proportion of females included (67.6%), as the majority of vaccine recipients were healthcare workers vaccinated under the Sisonke clinical trial, and the nursing profession in South Africa is disproportionately weighted towards females (Table 4b). None of the 179 conditions evaluated amongst the vaccinated population had a statistically significant higher incidence risk ratio relative to unvaccinated controls (Table 4c).

**Table 4a: List of analysed conditions**

|                                     |                                                          |                                                   |                                                                    |                                                       |                                 |
|-------------------------------------|----------------------------------------------------------|---------------------------------------------------|--------------------------------------------------------------------|-------------------------------------------------------|---------------------------------|
| Pulmonary embolism                  | Evans syndrome                                           | Sympathetic ophthalmia (SO)                       | Graves disease                                                     | Mucha-Habermann disease                               | Interstitial cystitis (IC)      |
| Kawasaki disease                    | Immune thrombocytopenic purpura (ITP)                    | Optic neuritis                                    | Ocular cicatricial pemphigoid                                      | Pernicious anemia (PA)                                | Autoimmune retinopathy          |
| Acute kidney injury                 | Thrombocytopenic purpura (TTP)                           | Leukocytoclastic vasculitis                       | Takayasu arteritis                                                 | Antiphospholipid syndrome                             | Sperm & testicular autoimmunity |
| Seizure                             | Herpes zoster infection                                  | Hypersensitivity pneumonitis                      | Paraneoplastic cerebellar degeneration (PCD)                       | Neuromyelitis optica                                  | Herpes simplex infection        |
| Arrhythmia                          | PANDAS                                                   | Lichen sclerosus                                  | Bells palsy                                                        | Myelin Oligodendrocyte Glycoprotein Antibody Disorder | Fibromyalgia                    |
| Juvenile diabetes (Type 1 diabetes) | Coxsackie myocarditis                                    | Myasthenia gravis                                 | Devic's disease (neuromyelitis optica)                             | Anti-GBM/Anti-TBM nephritis                           | Autoimmune oophoritis           |
| Type 1 diabetes                     | Chronic inflammatory demyelinating polyneuropathy (CIDP) | Achalasia                                         | Lambert-Eaton syndrome                                             | POEMS syndrome                                        | Ligneous conjunctivitis         |
| Anemia                              | Reactive Arthritis                                       | Mixed connective tissue disease (MCTD)            | Dressler's syndrome                                                | Chagas disease                                        | Rheumatoid arthritis            |
| Syncope                             | Henoch-Schonlein purpura (HSP)                           | Undifferentiated connective tissue disease (UCTD) | Hypogammaglobulinemia                                              | Lyme disease chronic                                  | Progesterone dermatitis         |
| Glomerulonephritis                  | Lupus                                                    | Erythema nodosum                                  | Polyglandular syndromes type I, II, III                            | Adult Still's disease                                 | Arthritis or arthropathy        |
| Cerebrovascular accident            | Polymyositis                                             | Progressive systemic sclerosis                    | Churg-Strauss Syndrome (CSS) or Eosinophilic Granulomatosis (EGPA) | Polyarteritis nodosa                                  | Autoimmune orchitis             |
| Deep-vein thrombosis                | Subacute bacterial endocarditis (SBE)                    | Ankylosing spondylitis                            | Granulomatosis with Polyangiitis                                   | Lichen planus                                         | Hyperthyroidism                 |
| Pericarditis                        | Autoimmune pancreatitis                                  | Alopecia areata                                   | Juvenile myositis (JM)                                             | Scleroderma                                           | Intracranial hemorrhage         |
| Myocardial infarction               | Autoimmune encephalomyelitis                             | Pemphigus                                         | Eosinophilic fasciitis                                             | Vitiligo                                              | Castleman disease (CD)          |

|                                     |                                    |                                      |                                                          |                                     |                               |
|-------------------------------------|------------------------------------|--------------------------------------|----------------------------------------------------------|-------------------------------------|-------------------------------|
| Vertigo                             | Multiple sclerosis                 | Linear IgA disease (LAD)             | Essential mixed cryoglobulinemia                         | Other Immune responses              | Lymphopenia                   |
|                                     |                                    | Goodpastures                         |                                                          |                                     | Bullous                       |
| Myocarditis                         | Transverse myelitis                | syndrome                             | Pure red cell aplasia (PRCA)                             | Dermatomyositis pemphigoid          | Giant cell Primary sclerosing |
| IgG4-related                        | Hidradenitis Suppurativa           | myocarditis cholangitis              | sclerosing disease                                       | CREST syndrome (HS) (Acne Inversa)  | Crohns disease                |
| Fibrosing alveolitis                | Polymyalgia rheumatica             | Behcets disease                      | Postmyocardial infarction syndrome                       | Microscopic polyangiitis (MPA)      | Sjögrens syndrome             |
| Autoimmune urticarial               | Pars planitis (peripheral uveitis) | Benign mucosal pemphigoid            | Inclusion body myositis (IBM)                            | Autoimmune hepatitis                | Addisons disease              |
| Perivenous encephalomyelitis        | Uveitis                            | Other thrombosis                     | Palindromic rheumatism (PR)                              | Juvenile arthritis                  | Retroperitoneal fibrosis      |
| Paresthesia                         | Vogt-Koyanagi-Harada Disease       | Baló disease                         | Chronic recurrent multifocal osteomyelitis (CRMO)        | Motor neuron disease                | Autoimmune angioedema         |
| Rheumatic fever                     | Peripheral neuropathy              | Cogans syndrome                      | Paroxysmal nocturnal hemoglobinuria (PNH)                | Dermatitis herpetiformis            | Parry Romberg syndrome        |
| Myositis                            | Discoid lupus                      | Susacs syndrome                      | Temporal arteritis/Giant cell arteritis                  | Neutropenia                         | Thyroid eye disease (TED)     |
| Lymphadenopathy                     | IgA Nephropathy                    | Congenital heart block               | Giant cell arteritis (temporal arteritis)                | Autoimmune dysautonomia             | Sarcoidosis                   |
| Axonal & neuronal neuropathy (AMAN) | Primary Biliary Cholangitis        | Hashimotos thyroiditis               | Amyloidosis                                              | Celiac disease                      | Scleritis                     |
| Thrombocytopenia                    | Endometriosis                      | Menieres disease                     | Agammaglobulinemia                                       | Psoriatic arthritis                 | Ulcerative colitis (UC)       |
| Guillain-Barre syndrome             | Vasculitis                         | Cicatricial pemphigoid               | Restless legs syndrome (RLS)/Stiff person syndrome (SPS) | Relapsing polychondritis            | Cold agglutinin disease       |
| Autoimmune myocarditis              | Postpericardiotomy syndrome        | Moorens ulcer                        | Herpes gestationis or pemphigoid gestationis (PG)        | Psoriasis                           | Schmidt syndrome              |
|                                     |                                    | Raynauds phenomenon                  |                                                          |                                     | Reflex sympathetic dystrophy  |
|                                     |                                    | Multifocal Motor Neuropathy (MMN) or | Neonatal Lupus                                           | Autoimmune inner ear disease (AIED) |                               |

Eosinophilic  
esophagitis (EoE)

Parsonage-Turner  
syndrome

MMNCB

Appendicitis

Hemolytic anemia

Pyoderma gangrenosum

Tolosa-Hunt syndrome  
(THS)

Narcolepsy

**Table 4b: Data characteristics**

| Characteristics                                             | Vaccination analysis           |                             |
|-------------------------------------------------------------|--------------------------------|-----------------------------|
|                                                             | Vaccinated Group (N = 103,315) | Control Group (N = 103,315) |
| Median age (IQR) - yr                                       |                                |                             |
| Age group - no. (%)                                         |                                |                             |
| <18                                                         | (0.0)                          | 71 (0.0)                    |
| 18-39                                                       | 55,363 (0.5)                   | 56,803 (0.5)                |
| 40-49                                                       | 26,111 (0.3)                   | 25,533 (0.2)                |
| 50-59                                                       | 14,612 (0.1)                   | 14,130 (0.1)                |
| 60-69                                                       | 5,762 (0.1)                    | 5,430 (0.1)                 |
| 70-79                                                       | 1,302 (0.0)                    | 1,199 (0.0)                 |
| >=80                                                        | 166 (0.0)                      | 151 (0.0)                   |
| Sex - no (%)                                                |                                |                             |
| Female                                                      | 69,808 (67.6)                  | 69,808 (67.6)               |
| Male                                                        | 33,507 (32.4)                  | 33,507 (32.4)               |
| Chronic condition count                                     |                                |                             |
| 0                                                           | 75,807 (73.4)                  | 75,807 (73.4)               |
| 1                                                           | 17,559 (17.0)                  | 17,559 (17.0)               |
| 2                                                           | 5,482 (5.3)                    | 5,482 (5.3)                 |
| 3                                                           | 2,492 (2.4)                    | 2,492 (2.4)                 |
| 4+                                                          | 1,977 (1.9)                    | 1,977 (1.9)                 |
| No. of influenza vaccinations during preceding 5 yr - no(%) |                                |                             |
| 0                                                           | 89,530 (86.7)                  | 89,530 (86.7)               |
| 1                                                           | 10,198 (9.9)                   | 10,198 (9.9)                |
| 2                                                           | 1,992 (1.9)                    | 1,992 (1.9)                 |
| 3                                                           | 1,040 (1.0)                    | 1,040 (1.0)                 |
| 4                                                           | 479 (0.5)                      | 479 (0.5)                   |
| 5                                                           | 77 (0.1)                       | 77 (0.1)                    |

**Table 4c: Conditions studied**

| Condition | Average study population exposure (in days) | Average clinical twin exposure (in days) | Adverse events for study population (95% CI) | Adverse events for clinical twin population (95% CI) | Risk Ratio (95% CI) |
|-----------|---------------------------------------------|------------------------------------------|----------------------------------------------|------------------------------------------------------|---------------------|
| Achalasia | 3,227,809                                   | 3,227,799                                | 0.0 (0.0 to 0.0)                             | 0.37 (0.0 to 2.0)                                    | 0.0 (0.0 to 0.0)    |



|                     |           |           |                    |                    |                     |
|---------------------|-----------|-----------|--------------------|--------------------|---------------------|
| Acute kidney injury | 3,189,599 | 3,189,597 | 6.32 (2.0 to 12.0) | 7.01 (2.0 to 13.0) | 1.13 (0.29 to 3.85) |
| Addisons disease    | 3,232,734 | 3,232,734 | 0.0 (0.0 to 0.0)   | 0.0 (0.0 to 0.0)   | 0.0 (nan to nan)    |

| Condition                           | Average study population exposure (in days) | Average clinical twin exposure (in days) | Adverse events for study population (95% CI) | Adverse events for clinical twin population (95% CI) | Risk Ratio (95% CI) |
|-------------------------------------|---------------------------------------------|------------------------------------------|----------------------------------------------|------------------------------------------------------|---------------------|
| Adult Still's disease               | 3,231,550                                   | 3,231,549                                | 0.0 (0.0 to 0.0)                             | 0.03 (0.0 to 1.0)                                    | 0.0 (0.0 to 0.0)    |
| Agammaglobulinemia                  | 3,227,528                                   | 3,227,527                                | 0.0 (0.0 to 0.0)                             | 0.04 (0.0 to 1.0)                                    | 0.0 (0.0 to 0.0)    |
| Alopecia areata                     | 3,187,925                                   | 3,187,813                                | 2.8 (0.0 to 6.0)                             | 7.61 (3.0 to 13.0)                                   | 0.42 (0.0 to 1.25)  |
| Amyloidosis                         | 3,232,258                                   | 3,232,258                                | 0.0 (0.0 to 0.0)                             | 0.0 (0.0 to 0.0)                                     | 0.0 (0.0 to 0.0)    |
| Anemia                              | 2,667,434                                   | 2,667,252                                | 37.17 (26.0 to 48.0)                         | 47.8 (35.0 to 61.0)                                  | 0.79 (0.51 to 1.16) |
| Ankylosing spondylitis              | 3,216,146                                   | 3,216,117                                | 0.9 (0.0 to 3.0)                             | 1.58 (0.0 to 4.0)                                    | 0.59 (0.0 to 2.0)   |
| Anti-GBM/Anti-TBM nephritis         | 3,224,889                                   | 3,224,886                                | 0.0 (0.0 to 0.0)                             | 0.17 (0.0 to 1.0)                                    | 0.0 (0.0 to 0.0)    |
| Antiphospholipid syndrome           | 3,230,575                                   | 3,230,569                                | 0.2 (0.0 to 1.0)                             | 0.36 (0.0 to 2.0)                                    | 0.16 (0.0 to 1.0)   |
| Appendicitis                        | 3,070,563                                   | 3,070,436                                | 12.34 (6.0 to 21.0)                          | 16.88 (9.0 to 25.0)                                  | 0.78 (0.31 to 1.5)  |
| Arrhythmia                          | 3,036,318                                   | 3,036,451                                | 23.31 (14.0 to 33.0)                         | 24.79 (16.0 to 35.0)                                 | 0.98 (0.52 to 1.71) |
| Arthritis or arthropathy            | 2,211,811                                   | 2,211,869                                | 66.76 (51.0 to 83.0)                         | 63.92 (50.0 to 79.52)                                | 1.06 (0.74 to 1.49) |
| Autoimmune angioedema               | 3,231,821                                   | 3,231,821                                | 0.0 (0.0 to 0.0)                             | 0.0 (0.0 to 0.0)                                     | 0.0 (nan to nan)    |
| Autoimmune dysautonomia             | 3,228,278                                   | 3,228,275                                | 0.73 (0.0 to 2.0)                            | 0.95 (0.0 to 3.0)                                    | 0.53 (0.0 to 2.0)   |
| Autoimmune encephalomyelitis        | 3,224,649                                   | 3,224,625                                | 0.0 (0.0 to 0.0)                             | 0.71 (0.0 to 3.0)                                    | 0.0 (0.0 to 0.0)    |
| Autoimmune hepatitis                | 3,230,609                                   | 3,230,605                                | 0.0 (0.0 to 0.0)                             | 0.13 (0.0 to 1.0)                                    | 0.0 (0.0 to 0.0)    |
| Autoimmune inner ear disease (AIED) | 3,202,773                                   | 3,202,796                                | 4.38 (1.0 to 9.0)                            | 2.69 (0.0 to 6.0)                                    | 1.99 (0.25 to 6.0)  |
| Autoimmune myocarditis              | 3,225,825                                   | 3,225,820                                | 0.0 (0.0 to 0.0)                             | 0.35 (0.0 to 2.0)                                    | 0.0 (0.0 to 0.0)    |

|                                     |           |           |                       |                      |                     |
|-------------------------------------|-----------|-----------|-----------------------|----------------------|---------------------|
| Autoimmune oophoritis               | 3,147,456 | 3,147,459 | 7.47 (3.0 to 13.0)    | 7.31 (2.0 to 13.0)   | 1.23 (0.36 to 3.42) |
| Autoimmune orchitis                 | 3,172,859 | 3,172,955 | 8.21 (3.0 to 14.0)    | 5.35 (1.0 to 10.52)  | 1.97 (0.43 to 6.0)  |
| Autoimmune pancreatitis             | 3,219,995 | 3,219,983 | 0.0 (0.0 to 0.0)      | 0.75 (0.0 to 3.0)    | 0.0 (0.0 to 0.0)    |
| Autoimmune retinopathy              | 3,145,920 | 3,145,928 | 10.34 (4.0 to 17.0)   | 10.79 (5.0 to 18.0)  | 1.07 (0.39 to 2.5)  |
| Autoimmune urticarial               | 2,946,721 | 2,946,549 | 19.25 (11.0 to 28.52) | 28.56 (19.0 to 39.0) | 0.7 (0.34 to 1.12)  |
| Axonal & neuronal neuropathy (AMAN) | 3,219,677 | 3,219,645 | 0.9 (0.0 to 3.0)      | 2.75 (0.0 to 6.0)    | 0.42 (0.0 to 2.0)   |
| Baló disease                        | 3,232,634 | 3,232,634 | 0.0 (0.0 to 0.0)      | 0.0 (0.0 to 0.0)     | 0.0 (nan to nan)    |
| Behcets disease                     | 3,232,734 | 3,232,734 | 0.0 (0.0 to 0.0)      | 0.0 (0.0 to 0.0)     | 0.0 (nan to nan)    |
| Bells palsy                         | 3,232,734 | 3,232,734 | 0.0 (0.0 to 0.0)      | 0.0 (0.0 to 0.0)     | 0.0 (nan to nan)    |

| Condition                                                          | Average study population exposure (in days) | Average clinical twin exposure (in days) | Adverse events for study population (95% CI) | Adverse events for clinical twin population (95% CI) | Risk Ratio (95% CI) |
|--------------------------------------------------------------------|---------------------------------------------|------------------------------------------|----------------------------------------------|------------------------------------------------------|---------------------|
| Benign mucosal pemphigoid                                          | 3,232,258                                   | 3,232,258                                | 0.0 (0.0 to 0.0)                             | 0.0 (0.0 to 0.0)                                     | 0.0 (nan to nan)    |
| Bullous pemphigoid                                                 | 3,231,658                                   | 3,231,656                                | 0.0 (0.0 to 0.0)                             | 0.06 (0.0 to 1.0)                                    | 0.0 (0.0 to 0.0)    |
| CREST syndrome                                                     | 3,231,835                                   | 3,231,835                                | 0.0 (0.0 to 0.0)                             | 0.0 (0.0 to 0.0)                                     | 0.0 (nan to nan)    |
| Castleman disease (CD)                                             | 3,225,441                                   | 3,225,424                                | 0.0 (0.0 to 0.0)                             | 0.62 (0.0 to 2.0)                                    | 0.0 (0.0 to 0.0)    |
| Celiac disease                                                     | 3,225,081                                   | 3,225,068                                | 0.0 (0.0 to 0.0)                             | 0.61 (0.0 to 3.0)                                    | 0.0 (0.0 to 0.0)    |
| Cerebrovascular accident                                           | 3,147,313                                   | 3,147,296                                | 7.6 (3.0 to 13.0)                            | 9.08 (4.0 to 15.52)                                  | 0.95 (0.31 to 2.59) |
| Chagas disease                                                     | 3,232,180                                   | 3,232,180                                | 0.0 (0.0 to 0.0)                             | 0.0 (0.0 to 0.0)                                     | 0.0 (nan to nan)    |
| Chronic inflammatory demyelinating polyneuropathy (CIDP)           | 3,225,249                                   | 3,225,209                                | 0.0 (0.0 to 0.0)                             | 1.99 (0.0 to 5.0)                                    | 0.0 (0.0 to 0.0)    |
| Chronic recurrent multifocal osteomyelitis (CRMO)                  | 3,232,038                                   | 3,232,036                                | 0.0 (0.0 to 0.0)                             | 0.12 (0.0 to 1.0)                                    | 0.0 (0.0 to 0.0)    |
| Churg-Strauss Syndrome (CSS) or Eosinophilic Granulomatosis (EGPA) | 3,232,372                                   | 3,232,370                                | 0.0 (0.0 to 0.0)                             | 0.08 (0.0 to 1.0)                                    | 0.0 (0.0 to 0.0)    |

|                                       |           |           |                      |                      |                     |
|---------------------------------------|-----------|-----------|----------------------|----------------------|---------------------|
| Cicatricial pemphigoid                | 3,232,258 | 3,232,258 | 0.0 (0.0 to 0.0)     | 0.0 (0.0 to 0.0)     | 0.0 (nan to nan)    |
| Cogans syndrome                       | 3,232,734 | 3,232,734 | 0.0 (0.0 to 0.0)     | 0.0 (0.0 to 0.0)     | 0.0 (nan to nan)    |
| Cold agglutinin disease               | 3,231,446 | 3,231,443 | 0.0 (0.0 to 0.0)     | 0.09 (0.0 to 1.0)    | 0.0 (0.0 to 0.0)    |
| Congenital heart block                | 3,232,134 | 3,232,134 | 0.0 (0.0 to 0.0)     | 0.02 (0.0 to 0.0)    | 0.0 (0.0 to 0.0)    |
| Coxsackie myocarditis                 | 3,225,824 | 3,225,824 | 0.0 (0.0 to 0.0)     | 0.0 (0.0 to 0.0)     | 0.0 (nan to nan)    |
| Crohns disease                        | 3,232,734 | 3,232,734 | 0.0 (0.0 to 0.0)     | 0.0 (0.0 to 0.0)     | 0.0 (nan to nan)    |
| Deep-vein thrombosis                  | 3,105,790 | 3,105,901 | 17.26 (10.0 to 26.0) | 12.11 (6.0 to 19.0)  | 1.56 (0.7 to 3.13)  |
| Dermatitis herpetiformis              | 3,229,167 | 3,229,164 | 0.0 (0.0 to 0.0)     | 0.16 (0.0 to 1.0)    | 0.0 (0.0 to 0.0)    |
| Dermatomyositis                       | 3,230,704 | 3,230,703 | 0.0 (0.0 to 0.0)     | 0.04 (0.0 to 1.0)    | 0.0 (0.0 to 0.0)    |
| Devics disease (neuromyelitis optica) | 3,232,734 | 3,232,734 | 0.0 (0.0 to 0.0)     | 0.0 (0.0 to 0.0)     | 0.0 (nan to nan)    |
| Discoid lupus                         | 3,226,370 | 3,226,390 | 1.39 (0.0 to 4.0)    | 0.41 (0.0 to 2.0)    | 1.39 (0.0 to 4.0)   |
| Dresslers syndrome                    | 3,232,734 | 3,232,734 | 0.0 (0.0 to 0.0)     | 0.0 (0.0 to 0.0)     | 0.0 (nan to nan)    |
| Endometriosis                         | 2,905,162 | 2,905,088 | 22.67 (14.0 to 33.0) | 22.19 (14.0 to 31.0) | 1.07 (0.59 to 1.78) |
| Eosinophilic esophagitis (EoE)        | 3,135,425 | 3,135,350 | 3.39 (1.0 to 7.0)    | 6.04 (2.0 to 11.0)   | 0.68 (0.07 to 2.0)  |
| Eosinophilic fasciitis                | 3,232,380 | 3,232,379 | 0.0 (0.0 to 0.0)     | 0.05 (0.0 to 1.0)    | 0.0 (0.0 to 0.0)    |

| Condition                        | Average study population exposure (in days) | Average clinical twin exposure (in days) | Adverse events for study population (95% CI) | Adverse events for clinical twin population (95% CI) | Risk Ratio (95% CI) |
|----------------------------------|---------------------------------------------|------------------------------------------|----------------------------------------------|------------------------------------------------------|---------------------|
| Erythema nodosum                 | 3,224,679                                   | 3,224,701                                | 0.89 (0.0 to 3.0)                            | 0.44 (0.0 to 2.0)                                    | 0.84 (0.0 to 3.0)   |
| Essential mixed cryoglobulinemia | 3,232,565                                   | 3,232,565                                | 0.0 (0.0 to 0.0)                             | 0.01 (0.0 to 0.0)                                    | 0.0 (0.0 to 0.0)    |
| Evans syndrome                   | 3,226,511                                   | 3,226,534                                | 1.63 (0.0 to 4.0)                            | 0.11 (0.0 to 1.0)                                    | 1.62 (0.0 to 3.88)  |
| Fibromyalgia                     | 3,184,600                                   | 3,184,625                                | 9.93 (5.0 to 16.0)                           | 10.17 (4.48 to 17.0)                                 | 1.11 (0.42 to 2.6)  |

|                                                   |           |           |                       |                      |                     |
|---------------------------------------------------|-----------|-----------|-----------------------|----------------------|---------------------|
| Fibrosing alveolitis                              | 3,222,706 | 3,222,690 | 0.0 (0.0 to 0.0)      | 0.64 (0.0 to 2.0)    | 0.0 (0.0 to 0.0)    |
| Giant cell arteritis (temporal arteritis)         | 3,231,663 | 3,231,662 | 0.0 (0.0 to 0.0)      | 0.12 (0.0 to 1.0)    | 0.0 (0.0 to 0.0)    |
| Giant cell myocarditis                            | 3,221,587 | 3,221,573 | 0.0 (0.0 to 0.0)      | 1.01 (0.0 to 3.0)    | 0.0 (0.0 to 0.0)    |
| Glomerulonephritis                                | 3,009,371 | 3,009,279 | 14.5 (8.0 to 22.0)    | 16.95 (9.0 to 25.0)  | 0.91 (0.41 to 1.71) |
| Goodpastures syndrome                             | 3,232,734 | 3,232,734 | 0.0 (0.0 to 0.0)      | 0.0 (0.0 to 0.0)     | 0.0 (nan to nan)    |
| Granulomatosis with Polyangiitis                  | 3,232,700 | 3,232,700 | 0.0 (0.0 to 0.0)      | 0.0 (0.0 to 0.0)     | 0.0 (nan to nan)    |
| Graves disease                                    | 3,232,734 | 3,232,734 | 0.0 (0.0 to 0.0)      | 0.0 (0.0 to 0.0)     | 0.0 (nan to nan)    |
| Guillain-Barre syndrome                           | 3,226,331 | 3,226,334 | 0.92 (0.0 to 3.0)     | 1.05 (0.0 to 3.0)    | 0.7 (0.0 to 3.0)    |
| Hashimoto's thyroiditis                           | 3,232,734 | 3,232,734 | 0.0 (0.0 to 0.0)      | 0.0 (0.0 to 0.0)     | 0.0 (nan to nan)    |
| Hemolytic anemia                                  | 3,231,446 | 3,231,443 | 0.0 (0.0 to 0.0)      | 0.09 (0.0 to 1.0)    | 0.0 (0.0 to 0.0)    |
| Henoch-Schonlein purpura (HSP)                    | 3,224,358 | 3,224,337 | 0.0 (0.0 to 0.0)      | 0.86 (0.0 to 3.0)    | 0.0 (0.0 to 0.0)    |
| Herpes gestationis or pemphigoid gestationis (PG) | 3,230,789 | 3,230,784 | 0.0 (0.0 to 0.0)      | 0.18 (0.0 to 1.0)    | 0.0 (0.0 to 0.0)    |
| Herpes simplex infection                          | 2,971,196 | 2,971,120 | 17.93 (10.48 to 26.0) | 24.76 (16.0 to 36.0) | 0.76 (0.36 to 1.29) |
| Herpes zoster infection                           | 3,076,109 | 3,076,207 | 20.08 (11.48 to 30.0) | 21.04 (13.0 to 30.0) | 0.99 (0.5 to 1.64)  |
| Hidradenitis Suppurativa (HS) (Acne Inversa)      | 3,208,853 | 3,208,808 | 2.15 (0.0 to 5.0)     | 3.38 (0.0 to 7.0)    | 0.84 (0.0 to 3.0)   |
| Hypersensitivity pneumonitis                      | 3,214,211 | 3,214,192 | 0.0 (0.0 to 0.0)      | 1.0 (0.0 to 3.0)     | 0.0 (0.0 to 0.0)    |
| Hyperthyroidism                                   | 3,154,251 | 3,154,146 | 2.18 (0.0 to 5.52)    | 5.81 (1.0 to 11.0)   | 0.5 (0.0 to 2.0)    |
| Hypogammaglobulinemia                             | 3,232,248 | 3,232,248 | 0.0 (0.0 to 0.0)      | 0.0 (0.0 to 0.0)     | 0.0 (nan to nan)    |
| IgA Nephropathy                                   | 3,199,927 | 3,199,886 | 0.7 (0.0 to 3.0)      | 2.24 (0.0 to 6.0)    | 0.38 (0.0 to 2.0)   |
| IgG4-related sclerosing disease                   | 3,232,137 | 3,232,136 | 0.0 (0.0 to 0.0)      | 0.04 (0.0 to 1.0)    | 0.0 (0.0 to 0.0)    |
| Immune thrombocytopenic purpura (ITP)             | 3,227,052 | 3,227,075 | 1.63 (0.0 to 4.0)     | 0.11 (0.0 to 1.0)    | 1.62 (0.0 to 3.88)  |
| Inclusion body myositis (IBM)                     | 3,231,478 | 3,231,476 | 0.0 (0.0 to 0.0)      | 0.08 (0.0 to 1.0)    | 0.0 (0.0 to 0.0)    |

| Condition                              | Average study population exposure (in days) | Average clinical twin exposure (in days) | Adverse events for study population (95% CI) | Adverse events for clinical twin population (95% CI) | Risk Ratio (95% CI) |
|----------------------------------------|---------------------------------------------|------------------------------------------|----------------------------------------------|------------------------------------------------------|---------------------|
| Interstitial cystitis (IC)             | 3,207,419                                   | 3,207,450                                | 3.95 (0.0 to 8.0)                            | 2.18 (0.0 to 5.0)                                    | 2.24 (0.0 to 7.0)   |
| Intracranial hemorrhage                | 3,201,232                                   | 3,201,238                                | 2.25 (0.0 to 6.0)                            | 2.15 (0.0 to 5.0)                                    | 1.24 (0.0 to 4.0)   |
| Juvenile arthritis                     | 3,226,829                                   | 3,226,826                                | 0.0 (0.0 to 0.0)                             | 0.18 (0.0 to 1.52)                                   | 0.0 (0.0 to 0.0)    |
| Juvenile diabetes (Type 1 diabetes)    | 3,103,501                                   | 3,103,376                                | 5.09 (1.0 to 9.0)                            | 9.33 (4.0 to 15.0)                                   | 0.63 (0.13 to 1.75) |
| Juvenile myositis (JM)                 | 3,232,071                                   | 3,232,071                                | 0.0 (0.0 to 0.0)                             | 0.0 (0.0 to 0.0)                                     | 0.0 (0.0 to 0.0)    |
| Kawasaki disease                       | 3,232,398                                   | 3,232,390                                | 0.0 (0.0 to 0.0)                             | 1.1 (0.0 to 3.0)                                     | 0.0 (0.0 to 0.0)    |
| Lambert-Eaton syndrome                 | 3,232,609                                   | 3,232,609                                | 0.0 (0.0 to 0.0)                             | 0.0 (0.0 to 0.0)                                     | 0.0 (nan to nan)    |
| Leukocytoclastic vasculitis            | 3,209,970                                   | 3,209,957                                | 0.52 (0.0 to 2.0)                            | 1.52 (0.0 to 5.0)                                    | 0.33 (0.0 to 1.95)  |
| Lichen planus                          | 3,213,599                                   | 3,213,626                                | 1.85 (0.0 to 5.0)                            | 1.31 (0.0 to 4.0)                                    | 1.39 (0.0 to 4.0)   |
| Lichen sclerosus                       | 3,225,397                                   | 3,225,369                                | 0.0 (0.0 to 0.0)                             | 0.96 (0.0 to 3.0)                                    | 0.0 (0.0 to 0.0)    |
| Ligneous conjunctivitis                | 2,332,156                                   | 2,332,213                                | 53.94 (40.0 to 69.0)                         | 48.6 (36.0 to 62.52)                                 | 1.13 (0.76 to 1.65) |
| Linear IgA disease (LAD)               | 3,227,807                                   | 3,227,825                                | 0.84 (0.0 to 3.0)                            | 0.32 (0.0 to 2.0)                                    | 0.75 (0.0 to 2.0)   |
| Lupus                                  | 3,194,102                                   | 3,194,050                                | 4.22 (1.0 to 8.0)                            | 5.7 (1.0 to 11.0)                                    | 0.96 (0.1 to 3.5)   |
| Lyme disease chronic                   | 3,232,010                                   | 3,232,031                                | 0.9 (0.0 to 3.0)                             | 0.2 (0.0 to 1.0)                                     | 0.87 (0.0 to 3.0)   |
| Lymphadenopathy                        | 2,884,700                                   | 2,884,641                                | 19.04 (11.0 to 27.52)                        | 19.81 (12.0 to 29.0)                                 | 1.01 (0.51 to 1.76) |
| Lymphopenia                            | 3,225,715                                   | 3,225,712                                | 0.76 (0.0 to 3.0)                            | 0.39 (0.0 to 2.0)                                    | 0.65 (0.0 to 3.0)   |
| Menieres disease                       | 3,232,734                                   | 3,232,734                                | 0.0 (0.0 to 0.0)                             | 0.0 (0.0 to 0.0)                                     | 0.0 (nan to nan)    |
| Microscopic polyangiitis (MPA)         | 3,228,638                                   | 3,228,667                                | 1.05 (0.0 to 3.0)                            | 0.25 (0.0 to 2.0)                                    | 0.95 (0.0 to 3.0)   |
| Mixed connective tissue disease (MCTD) | 3,229,197                                   | 3,229,219                                | 0.94 (0.0 to 3.0)                            | 0.44 (0.0 to 2.0)                                    | 0.86 (0.0 to 3.0)   |
| Moorens ulcer                          | 3,232,734                                   | 3,232,734                                | 0.0 (0.0 to 0.0)                             | 0.0 (0.0 to 0.0)                                     | 0.0 (nan to nan)    |

|                                                       |           |           |                  |                   |                  |
|-------------------------------------------------------|-----------|-----------|------------------|-------------------|------------------|
| Motor neuron disease                                  | 3,229,370 | 3,229,368 | 0.0 (0.0 to 0.0) | 0.11 (0.0 to 1.0) | 0.0 (0.0 to 0.0) |
| Mucha-Habermann disease                               | 3,232,097 | 3,232,097 | 0.0 (0.0 to 0.0) | 0.02 (0.0 to 0.0) | 0.0 (0.0 to 0.0) |
| Multifocal Motor Neuropathy (MMN) or MMNCB            | 3,232,351 | 3,232,351 | 0.0 (0.0 to 0.0) | 0.0 (0.0 to 0.0)  | 0.0 (nan to nan) |
| Multiple sclerosis                                    | 3,207,647 | 3,207,615 | 0.0 (0.0 to 0.0) | 1.77 (0.0 to 5.0) | 0.0 (0.0 to 0.0) |
| Myasthenia gravis                                     | 3,227,268 | 3,227,263 | 0.0 (0.0 to 0.0) | 0.37 (0.0 to 2.0) | 0.0 (0.0 to 0.0) |
| Myelin Oligodendrocyte Glycoprotein Antibody Disorder | 3,231,805 | 3,231,795 | 0.0 (0.0 to 0.0) | 0.42 (0.0 to 2.0) | 0.0 (0.0 to 0.0) |

| Condition                     | Average study population exposure (in days) | Average clinical twin exposure (in days) | Adverse events for study population (95% CI) | Adverse events for clinical twin population (95% CI) | Risk Ratio (95% CI) |
|-------------------------------|---------------------------------------------|------------------------------------------|----------------------------------------------|------------------------------------------------------|---------------------|
| Myocardial infarction         | 3,192,589                                   | 3,192,671                                | 11.59 (6.0 to 19.0)                          | 9.5 (4.0 to 16.0)                                    | 1.4 (0.5 to 3.13)   |
| Myocarditis                   | 3,214,286                                   | 3,214,271                                | 0.0 (0.0 to 0.0)                             | 1.02 (0.0 to 3.0)                                    | 0.0 (0.0 to 0.0)    |
| Myositis                      | 3,103,371                                   | 3,103,553                                | 19.04 (12.0 to 27.52)                        | 11.34 (5.0 to 18.0)                                  | 1.87 (0.84 to 4.0)  |
| Narcolepsy                    | 3,228,216                                   | 3,228,210                                | 0.0 (0.0 to 0.0)                             | 0.25 (0.0 to 2.0)                                    | 0.0 (0.0 to 0.0)    |
| Neonatal Lupus                | 3,225,520                                   | 3,225,515                                | 0.0 (0.0 to 0.0)                             | 0.37 (0.0 to 2.0)                                    | 0.0 (0.0 to 0.0)    |
| Neuromyelitis optica          | 3,231,805                                   | 3,231,795                                | 0.0 (0.0 to 0.0)                             | 0.42 (0.0 to 2.0)                                    | 0.0 (0.0 to 0.0)    |
| Neutropenia                   | 3,224,034                                   | 3,224,029                                | 0.0 (0.0 to 0.0)                             | 0.37 (0.0 to 2.0)                                    | 0.0 (0.0 to 0.0)    |
| Ocular cicatricial pemphigoid | 3,232,154                                   | 3,232,148                                | 0.0 (0.0 to 0.0)                             | 0.17 (0.0 to 1.0)                                    | 0.0 (0.0 to 0.0)    |
| Optic neuritis                | 3,218,592                                   | 3,218,592                                | 2.0 (0.0 to 5.0)                             | 1.2 (0.0 to 4.0)                                     | 1.38 (0.0 to 4.0)   |
| Other Immune responses        | 3,231,272                                   | 3,231,639                                | 11.23 (5.0 to 18.0)                          | 0.86 (0.0 to 3.0)                                    | 8.96 (3.0 to 18.0)  |
| Other thrombosis              | 3,232,734                                   | 3,232,734                                | 0.0 (0.0 to 0.0)                             | 0.0 (0.0 to 0.0)                                     | 0.0 (nan to nan)    |
| POEMS syndrome                | 3,231,495                                   | 3,231,493                                | 0.0 (0.0 to 0.0)                             | 0.08 (0.0 to 1.0)                                    | 0.0 (0.0 to 0.0)    |
| Palindromic rheumatism (PR)   | 3,229,993                                   | 3,229,992                                | 0.0 (0.0 to 0.0)                             | 0.08 (0.0 to 1.0)                                    | 0.0 (0.0 to 0.0)    |

|                                              |           |           |                    |                   |                    |
|----------------------------------------------|-----------|-----------|--------------------|-------------------|--------------------|
| Paraneoplastic cerebellar degeneration (PCD) | 3,231,739 | 3,231,739 | 0.0 (0.0 to 0.0)   | 0.0 (0.0 to 0.0)  | 0.0 (nan to nan)   |
| Paresthesia                                  | 3,189,133 | 3,189,283 | 7.4 (2.48 to 13.0) | 2.59 (0.0 to 6.0) | 3.48 (0.6 to 10.0) |
| Paroxysmal nocturnal hemoglobinuria (PNH)    | 3,232,627 | 3,232,627 | 0.0 (0.0 to 0.0)   | 0.01 (0.0 to 0.0) | 0.0 (0.0 to 0.0)   |
| Parry Romberg syndrome                       | 3,230,999 | 3,230,997 | 0.0 (0.0 to 0.0)   | 0.07 (0.0 to 1.0) | 0.0 (0.0 to 0.0)   |
| Pars planitis (peripheral uveitis)           | 3,192,728 | 3,192,778 | 4.86 (1.0 to 10.0) | 3.18 (0.0 to 7.0) | 1.99 (0.25 to 7.0) |
| Parsonage-Turner syndrome                    | 3,231,637 | 3,231,637 | 0.0 (0.0 to 0.0)   | 0.0 (0.0 to 0.0)  | 0.0 (nan to nan)   |
| Pemphigus                                    | 3,229,298 | 3,229,296 | 0.0 (0.0 to 0.0)   | 0.17 (0.0 to 1.0) | 0.0 (0.0 to 0.0)   |
| Pericarditis                                 | 3,213,907 | 3,213,906 | 1.62 (0.0 to 4.52) | 1.23 (0.0 to 4.0) | 1.15 (0.0 to 4.0)  |
| Peripheral neuropathy                        | 3,229,219 | 3,229,234 | 0.85 (0.0 to 3.0)  | 0.23 (0.0 to 1.0) | 0.81 (0.0 to 3.0)  |
| Perivenous encephalomyelitis                 | 3,188,417 | 3,188,391 | 1.98 (0.0 to 5.0)  | 3.0 (0.0 to 7.0)  | 0.88 (0.0 to 3.51) |
| Pernicious anemia (PA)                       | 3,223,758 | 3,223,755 | 0.0 (0.0 to 0.0)   | 0.18 (0.0 to 1.0) | 0.0 (0.0 to 0.0)   |
| Polyarteritis nodosa                         | 3,229,454 | 3,229,485 | 1.05 (0.0 to 3.0)  | 0.16 (0.0 to 1.0) | 0.99 (0.0 to 3.0)  |
| Polyglandular syndromes type I, II, III      | 3,232,359 | 3,232,359 | 0.0 (0.0 to 0.0)   | 0.0 (0.0 to 0.0)  | 0.0 (nan to nan)   |

| Condition                          | Average study population exposure (in days) | Average clinical twin exposure (in days) | Adverse events for study population (95% CI) | Adverse events for clinical twin population (95% CI) | Risk Ratio (95% CI) |
|------------------------------------|---------------------------------------------|------------------------------------------|----------------------------------------------|------------------------------------------------------|---------------------|
| Polymyalgia rheumatic              | 3,214,910                                   | 3,214,972                                | 3.04 (0.0 to 7.0)                            | 1.23 (0.0 to 4.0)                                    | 2.27 (0.0 to 6.0)   |
| Polymyositis                       | 3,227,556                                   | 3,227,610                                | 2.91 (0.0 to 6.52)                           | 0.62 (0.0 to 3.0)                                    | 2.55 (0.0 to 6.0)   |
| Postmyocardial infarction syndrome | 3,232,396                                   | 3,232,393                                | 0.0 (0.0 to 0.0)                             | 0.09 (0.0 to 1.0)                                    | 0.0 (0.0 to 0.0)    |
| Postpericardiotomy syndrome        | 3,232,616                                   | 3,232,607                                | 0.0 (0.0 to 0.0)                             | 0.45 (0.0 to 2.0)                                    | 0.0 (0.0 to 0.0)    |
| Primary Biliary Cholangitis        | 3,224,739                                   | 3,224,734                                | 2.48 (0.0 to 6.0)                            | 1.46 (0.0 to 4.0)                                    | 1.62 (0.0 to 5.0)   |
| Primary sclerosing cholangitis     | 3,224,394                                   | 3,224,388                                | 2.48 (0.0 to 6.0)                            | 1.49 (0.0 to 4.0)                                    | 1.61 (0.0 to 5.0)   |

|                                                          |                                                    |                                                 |                                                     |                                                             |                            |
|----------------------------------------------------------|----------------------------------------------------|-------------------------------------------------|-----------------------------------------------------|-------------------------------------------------------------|----------------------------|
| Progesterone dermatitis                                  | 2,340,304                                          | 2,340,372                                       | 68.9 (54.0 to 85.52)                                | 68.57 (51.0 to 86.0)                                        | 1.02 (0.72 to 1.41)        |
| Progressive systemic sclerosis                           | 3,228,477                                          | 3,228,476                                       | 0.0 (0.0 to 0.0)                                    | 0.07 (0.0 to 1.0)                                           | 0.0 (0.0 to 0.0)           |
| Psoriasis                                                | 3,150,517                                          | 3,150,499                                       | 6.34 (2.0 to 12.0)                                  | 7.87 (3.0 to 13.0)                                          | 0.96 (0.23 to 2.64)        |
| Psoriatic arthritis                                      | 3,150,025                                          | 3,150,007                                       | 6.34 (2.0 to 12.0)                                  | 7.87 (3.0 to 13.0)                                          | 0.96 (0.23 to 2.64)        |
| Pulmonary embolism                                       | 3,109,556                                          | 3,109,669                                       | 12.86 (7.0 to 21.0)                                 | 10.49 (5.0 to 18.0)                                         | 1.37 (0.55 to 3.11)        |
| Pure red cell aplasia (PRCA)                             | 3,231,132                                          | 3,231,132                                       | 0.0 (0.0 to 0.0)                                    | 0.01 (0.0 to 0.0)                                           | 0.0 (0.0 to 0.0)           |
| Pyoderma gangrenosum                                     | 3,231,641                                          | 3,231,641                                       | 0.0 (0.0 to 0.0)                                    | 0.16 (0.0 to 1.0)                                           | 0.0 (0.0 to 0.0)           |
| Raynauds phenomenon                                      | 3,232,734                                          | 3,232,734                                       | 0.0 (0.0 to 0.0)                                    | 0.0 (0.0 to 0.0)                                            | 0.0 (nan to nan)           |
| Reactive Arthritis                                       | 3,222,973                                          | 3,223,023                                       | 3.21 (0.0 to 7.0)                                   | 1.03 (0.0 to 3.0)                                           | 2.42 (0.0 to 6.0)          |
| Reflex sympathetic dystrophy                             | 3,231,171                                          | 3,231,183                                       | 1.35 (0.0 to 4.0)                                   | 0.14 (0.0 to 1.0)                                           | 1.23 (0.0 to 3.0)          |
| Relapsing polychondritis                                 | 3,230,175                                          | 3,230,180                                       | 0.53 (0.0 to 2.0)                                   | 0.37 (0.0 to 2.0)                                           | 0.5 (0.0 to 2.0)           |
| Restless legs syndrome (RLS)/Stiff person syndrome (SPS) | 3,222,348                                          | 3,222,312                                       | 0.0 (0.0 to 0.0)                                    | 2.0 (0.0 to 5.0)                                            | 0.0 (0.0 to 0.0)           |
| Retroperitoneal fibrosis                                 | 3,229,267                                          | 3,229,264                                       | 0.0 (0.0 to 0.0)                                    | 0.19 (0.0 to 1.0)                                           | 0.0 (0.0 to 0.0)           |
| Rheumatic fever                                          | 3,208,940                                          | 3,208,952                                       | 1.57 (0.0 to 4.0)                                   | 1.67 (0.0 to 4.0)                                           | 0.95 (0.0 to 3.45)         |
| Rheumatoid arthritis                                     | 3,085,558                                          | 3,085,571                                       | 11.77 (5.0 to 19.0)                                 | 14.25 (7.0 to 22.0)                                         | 0.9 (0.34 to 1.86)         |
| Sarcoidosis                                              | 3,220,129                                          | 3,220,143                                       | 1.0 (0.0 to 3.0)                                    | 0.61 (0.0 to 2.0)                                           | 0.82 (0.0 to 3.0)          |
| Schmidt syndrome                                         | 3,232,359                                          | 3,232,359                                       | 0.0 (0.0 to 0.0)                                    | 0.0 (0.0 to 0.0)                                            | 0.0 (nan to nan)           |
| Scleritis                                                | 3,214,650                                          | 3,214,630                                       | 0.99 (0.0 to 3.0)                                   | 1.75 (0.0 to 5.0)                                           | 0.61 (0.0 to 3.0)          |
| Scleroderma                                              | 3,228,608                                          | 3,228,603                                       | 0.0 (0.0 to 0.0)                                    | 0.17 (0.0 to 1.0)                                           | 0.0 (0.0 to 0.0)           |
| <b>Condition</b>                                         | <b>Average study population exposure (in days)</b> | <b>Average clinical twin exposure (in days)</b> | <b>Adverse events for study population (95% CI)</b> | <b>Adverse events for clinical twin population (95% CI)</b> | <b>Risk Ratio (95% CI)</b> |
| Seizure                                                  | 2,984,509                                          | 2,984,396                                       | 19.37 (12.0 to 28.52)                               | 25.25 (16.0 to 35.0)                                        | 0.8 (0.44 to 1.37)         |



|                                                   |           |           |                       |                       |                     |
|---------------------------------------------------|-----------|-----------|-----------------------|-----------------------|---------------------|
| Sjögrens syndrome                                 | 3,232,734 | 3,232,734 | 0.0 (0.0 to 0.0)      | 0.0 (0.0 to 0.0)      | 0.0 (nan to nan)    |
| Sperm & testicular autoimmunity                   | 3,213,695 | 3,213,691 | 0.96 (0.0 to 3.0)     | 1.41 (0.0 to 4.0)     | 0.67 (0.0 to 3.0)   |
| Subacute bacterial endocarditis (SBE)             | 3,228,351 | 3,228,343 | 0.0 (0.0 to 0.0)      | 0.37 (0.0 to 2.0)     | 0.0 (0.0 to 0.0)    |
| Susacs syndrome                                   | 3,232,734 | 3,232,734 | 0.0 (0.0 to 0.0)      | 0.0 (0.0 to 0.0)      | 0.0 (nan to nan)    |
| Sympathetic ophthalmia (SO)                       | 3,231,701 | 3,231,733 | 1.02 (0.0 to 3.0)     | 0.12 (0.0 to 1.0)     | 1.06 (0.0 to 3.0)   |
| Syncope                                           | 2,961,279 | 2,961,344 | 23.19 (14.0 to 33.0)  | 22.75 (14.0 to 32.52) | 1.07 (0.57 to 1.88) |
| Takayasu arteritis                                | 3,232,734 | 3,232,734 | 0.0 (0.0 to 0.0)      | 0.0 (0.0 to 0.0)      | 0.0 (nan to nan)    |
| Temporal arteritis/Giant cell arteritis           | 3,231,857 | 3,231,855 | 0.0 (0.0 to 0.0)      | 0.12 (0.0 to 1.0)     | 0.0 (0.0 to 0.0)    |
| Thrombocytopenia                                  | 3,200,216 | 3,200,232 | 2.56 (0.0 to 6.0)     | 1.88 (0.0 to 5.0)     | 1.52 (0.0 to 5.58)  |
| Thrombocytopenic purpura (TTP)                    | 3,227,052 | 3,227,075 | 1.63 (0.0 to 4.0)     | 0.11 (0.0 to 1.0)     | 1.62 (0.0 to 3.88)  |
| Thyroid eye disease (TED)                         | 3,204,746 | 3,204,729 | 1.67 (0.0 to 5.0)     | 2.6 (0.0 to 6.0)      | 0.82 (0.0 to 3.0)   |
| Tolosa-Hunt syndrome (THS)                        | 3,227,277 | 3,227,266 | 0.0 (0.0 to 0.0)      | 0.55 (0.0 to 2.0)     | 0.0 (0.0 to 0.0)    |
| Transverse myelitis                               | 3,229,760 | 3,229,797 | 1.76 (0.0 to 5.0)     | 0.26 (0.0 to 1.52)    | 1.68 (0.0 to 5.0)   |
| Type 1 diabetes                                   | 3,103,501 | 3,103,376 | 5.09 (1.0 to 9.0)     | 9.33 (4.0 to 15.0)    | 0.63 (0.13 to 1.75) |
| Ulcerative colitis (UC)                           | 3,157,352 | 3,157,336 | 4.61 (1.0 to 9.0)     | 4.73 (1.0 to 10.0)    | 1.31 (0.23 to 5.0)  |
| Undifferentiated connective tissue disease (UCTD) | 3,229,197 | 3,229,219 | 0.94 (0.0 to 3.0)     | 0.44 (0.0 to 2.0)     | 0.86 (0.0 to 3.0)   |
| Uveitis                                           | 3,193,094 | 3,193,144 | 4.86 (1.0 to 10.0)    | 3.18 (0.0 to 7.0)     | 1.99 (0.25 to 7.0)  |
| Vasculitis                                        | 3,208,063 | 3,208,046 | 0.52 (0.0 to 2.0)     | 1.65 (0.0 to 5.0)     | 0.32 (0.0 to 1.0)   |
| Vertigo                                           | 2,864,193 | 2,864,604 | 51.75 (39.0 to 66.52) | 42.37 (30.0 to 55.52) | 1.25 (0.83 to 1.91) |
| Vitiligo                                          | 3,218,418 | 3,218,424 | 2.05 (0.0 to 5.0)     | 1.07 (0.0 to 3.0)     | 1.52 (0.0 to 4.58)  |
| Vogt-Koyanagi-Harada Disease                      | 3,193,094 | 3,193,144 | 4.86 (1.0 to 10.0)    | 3.18 (0.0 to 7.0)     | 1.99 (0.25 to 7.0)  |
